# Supplementary material for: Shake and bake: a robust and cost- effective sample preparation workflow for plasma and cerebrospinal fluid
Source: Research Square preprint supplement (doi:10.21203/rs.3.rs-8071230/v1), 2025-11-20
Supplement: Supplementary file 3 [file 865bd80ac8a2e0f9e23a87c9.docx]

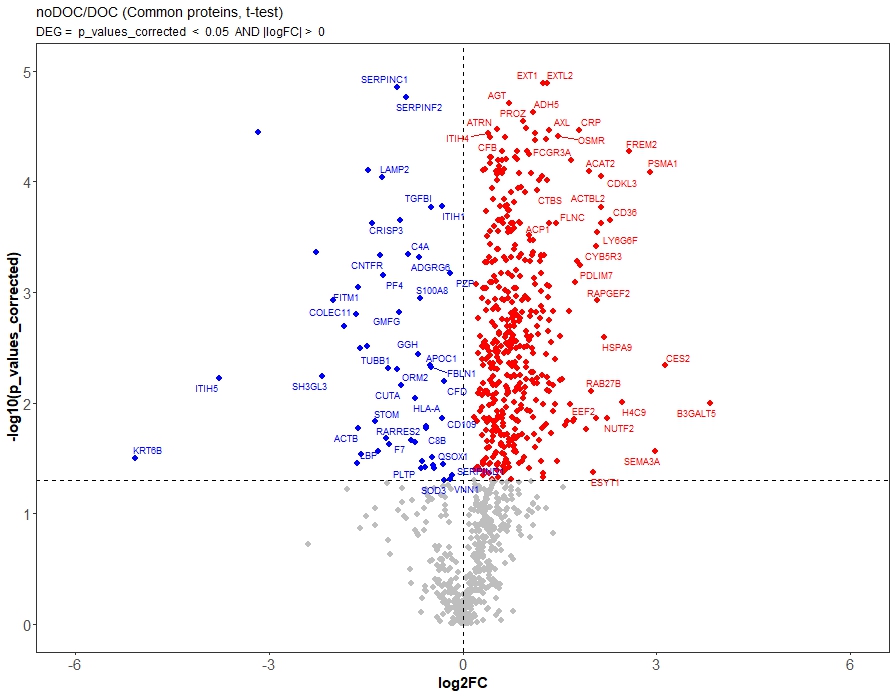


Supplementary Figure 1. Volcano plot of common protein groups identified with and without DOC. Only proteins with at least four observations were included in the analysis. Data were log₂-transformed and differences between groups were assessed using a two-sample *t*-test. The x-axis represents the log₂ fold change and the y-axis shows the –log₁₀ *p*-values.


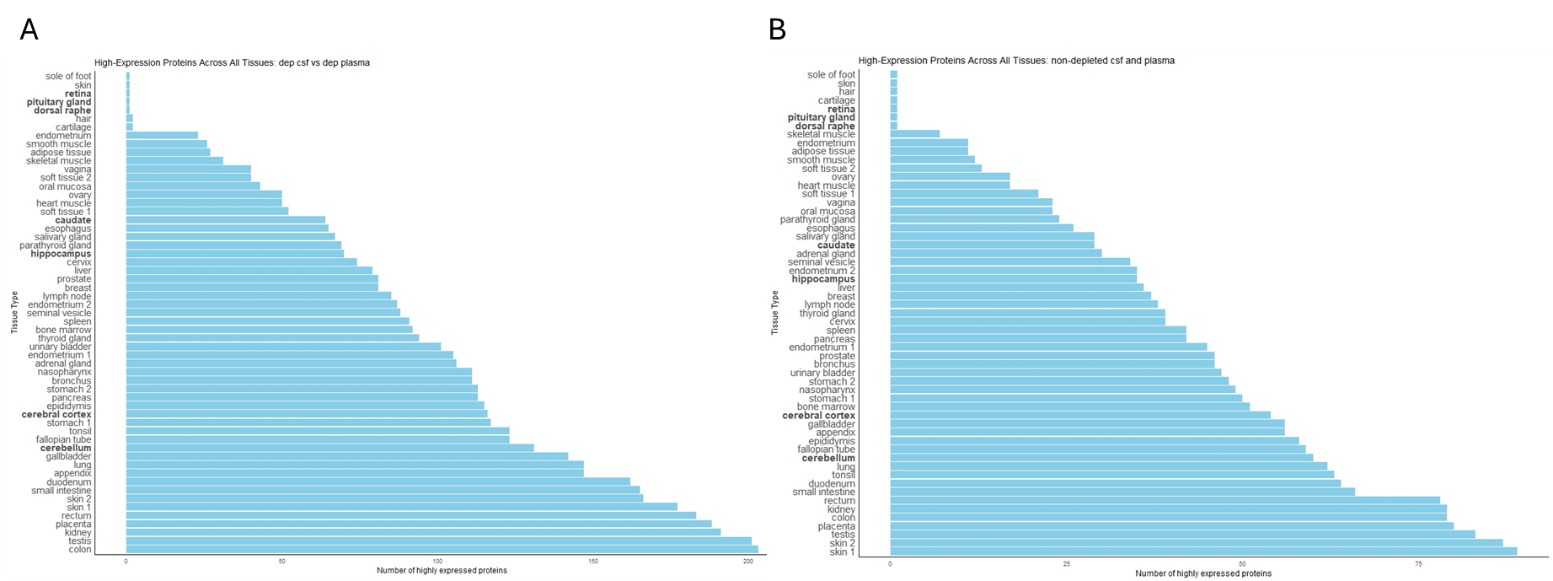


Supplementary Figure 2. Overall tissue distribution of overlapping proteins in depleted CSF and plasma (A) and non-depleted CSF and plasma (B). Brain tissues are shown in bold.

Supplementary Figure 3. Completeness curves for CSF and plasma proteins, respectively, in the ALS cohort.
